# Supplementary material for: Prediction of Phenotypic Antimicrobial Resistance Profiles From Whole Genome Sequences of Non-typhoidal Salmonella enterica
Source: Front Microbiol. 2018 Mar 27;9:592. doi: 10.3389/fmicb.2018.00592 (PMC5880904; doi:10.3389/fmicb.2018.00592)
Supplement: TABLE S2 — Resistance genes detected in non-typhoidal Salmonella enterica, their prevalence in all serovars, S. Typhimurium, S. Enteritidis, and S. Kentucky and the antimicrobial class to which they confer resistance. [file Table_2.xlsx]

## Sheet: Sheet1
		Number (%)
Resistance gene	Antimicrobial class	Total (n=3491)	S. Typhimurium (n=827)	S. Enteritidis (n=294)	S. Kentucky (n=109)	Accession number
aac(3)-Id	aminoglycosides	50 (1.43)	0	0	47 (43.12)	NG_048569
aac(3)-IIa	aminoglycosides	36 (1.03)	1 (0.12)	0	0	NG_047244
aac(3)-IId	aminoglycosides	18 (0.52)	11 (1.33)	0	0	EU022314
aac(3)-IVa	aminoglycosides	24 (0.69)	16 (1.93)	0	0	X01385
aac(3)-VIa	aminoglycosides	2 (0.06)	1 (0.12)	0	0	NG_­­047262
aac(6')-Iaa	aminoglycosides	1486 (42.57)	821 (99.27)	3 (1.02)	81 (74.31)	NC_003197
aac(6')-Ii	aminoglycosides	1 (0.03)	1 (0.12)	0	0	L12710
aac(6')-IIc	aminoglycosides	2 (0.06)	0	0	0	NG_047273
aac(6')-Iy	aminoglycosides	1997 (57.20)	4 (0.48)	291 (98.98)	28 (25.69)	AF144881
aadA1	aminoglycosides	19 (0.54)	10 (1.21)	0	0	NG_047326
aadA12	aminoglycosides	10 (0.29)	4 (0.48)	0	2 (1.83)	NG_047333
aadA13	aminoglycosides	3 (0.09)	2 (0.24)	0	0	NG_047336
aadA15	aminoglycosides	18 (0.52)	9 (1.09)	1 (0.34)	1 (0.92)	NG_047338
aadA16	aminoglycosides	5 (0.14)	0	1 (0.34)	0	NG_047340
aadA17	aminoglycosides	107 (3.07)	72 (8.71)	0	0	FJ460181
aadA2	aminoglycosides	189 (5.41)	111 (13.42)	2 (0.68)	5 (4.59)	KU866461
aadA22	aminoglycosides	9 (0.26)	4 (0.48)	0	1 (0.92)	NG_047347
aadA23	aminoglycosides	11 (0.32)	8 (0.97)	1 (0.34)	0	KU948609
aadA3	aminoglycosides	8 (0.23)	4 (0.48)	0	0	AF047479
aadA5	aminoglycosides	5 (0.14)	2 (0.24)	0	0	FJ460238
aadA7	aminoglycosides	64 (1.83)	0	0	60 (55.05)	LC195298
aadA8b	aminoglycosides	39 (1.12)	12 (1.45)	0	1 (0.92)	NG_048579
ant(2'')-Ia	aminoglycosides	12 (0.34)	9 (1.09)	0	0	KX859086
aph(3'')-Ib	aminoglycosides	1 (0.03)	0	0	0	NG_047463
aph(3')-IIa	aminoglycosides	10 (0.29)	5 (0.60)	0	0	NG_047417
aph(4)-Ia	aminoglycosides	23 (0.66)	15 (1.81)	0	0	NG_047456
strA-strB	aminoglycosides	537 (15.38)	381 (46.07)	9 (3.06)	13 (11.93)	CP011429
catA1	phenicols	19 (0.54)	16 (1.93)	2 (0.68)	1 (0.92)	V00622
catA2	phenicols	12 (0.34)	3 (0.36)	0	0	NG_047592
catB3	phenicols	1 (0.03)	0	0	0	NG_047605
cml-1	phenicols	67 (1.92)	34 (4.11)	2 (0.68)	5 (4.59)	M22614
floR	phenicols	147 (4.21)	84 (10.16)	1 (0.34)	10 (9.17)	NG_047860
aac(6')-Ib-cr	quinolones	7 (0.20)	0	1 (0.34)	1 (0.92)	KC417378
gyrA[100:Y-H]	quinolones	4 (0.11)	0	4 (1.36)	0	CP009102
gyrA[100:Y-X]	quinolones	1 (0.03)	0	1 (0.34)	0	CP009102
gyrA[69:V-X]	quinolones	1 (0.03)	0	0	0	CP009102
gyrA[72:D-X;82:D-X]	quinolones	1 (0.03)	0	0	0	CP009102
gyrA[83:S-F;87:D-G]	quinolones	14 (0.40)	0	0	11 (10.09)	CP009102
gyrA[83:S-F;87:D-N]	quinolones	26 (0.74)	0	0	24 (22.02)	CP009102
gyrA[83:S-F;87:D-Y]	quinolones	41 (1.17)	0	0	41 (37.61)	CP009102
gyrA[83:S-F]	quinolones	52 (1.49)	6 (0.73)	10 (3.40)	2 (1.83)	CP009102
gyrA[83:S-X;87:D-X;100:Y-X]	quinolones	1 (0.03)	0	0	1 (0.92)	CP009102
gyrA[83:S-Y]	quinolones	111 (3.18)	2 (0.24)	21 (7.14)	0	CP009102
gyrA[87:D-B]	quinolones	6 (0.17)	5 (0.60)	0	0	CP009102
gyrA[87:D-G;100:Y-H]	quinolones	1 (0.03)	0	1 (0.34)	0	CP009102
gyrA[87:D-G]	quinolones	36 (1.03)	1 (0.12)	16 (5.44)	0	CP009102
gyrA[87:D-N]	quinolones	64 (1.83)	20 (2.42)	27 (9.18)	0	CP009102
gyrA[87:D-Y]	quinolones	155 (4.44)	16 (1.93)	35 (11.90)	0	CP009102
oqxA	quinolones	1 (0.03)	0	0	0	MF418180
oqxB	quinolones	1 (0.03)	0	0	0	MF418180
parC[56:A-V;57:T-S]	quinolones	1 (0.03)	0	0	0	CP009102
parC[57:T-N]	quinolones	1 (0.03)	0	0	0	CP009102
parC[57:T-S;80:S-I]	quinolones	77 (2.21)	0	0	76 (69.72)	CP009102
parC[57:T-S;80:S-R]	quinolones	4 (0.11)	0	0	0	CP009102
parC[57:T-S;98:P-A]	quinolones	1 (0.03)	0	0	0	CP009102
parC[57:T-S]	quinolones	1808 (51.79)	7 (0.85)	2 (0.68)	32 (29.36)	CP009102
parC[57:T-X;80:S-X]	quinolones	1 (0.03)	0	0	1 (0.92)	CP009102
parC[57:T-X]	quinolones	5 (0.14)	1 (0.12)	0	0	CP009102
qepA1	quinolones	1 (0.03)	0	0	0	NG_050459
qnrA1	quinolones	10 (0.29)	8 (0.97)	0	0	NG_050462
qnrB1	quinolones	3 (0.09)	1 (0.12)	0	0	NG_051734
qnrB19	quinolones	49 (1.40)	4 (0.48)	8 (2.72)	0	HM146784
qnrB6	quinolones	4 (0.11)	0	1 (0.34)	0	NG_050523
qnrB7	quinolones	1 (0.03)	0	0	0	NG_050533
qnrB9	quinolones	4 (0.11)	0	0	0	EF653270
qnrD	quinolones	19 (0.54)	2 (0.24)	0	0	NG_050541
qnrS1	quinolones	95 (2.72)	33 (3.99)	1 (0.34)	1 (0.92)	GQ336885
qnrS2	quinolones	4 (0.11)	0	0	0	KU644708
sul1	sulphonamides	350 (10.03)	99 (11.97)	3 (1.02)	62 (56.88)	NG_048086
sul2	sulphonamides	490 (14.04)	390 (47.16)	8 (2.72)	7 (6.42)	NG_048110
sul3	sulphonamides	75 (2.15)	31 (3.75)	2 (0.68)	3 (2.75)	NG_048148
tet(A)	tetracyclines	843 (24.15)	426 (51.51)	22 (7.48)	71 (65.14)	HQ840942
tet(C)	tetracyclines	10 (0.29)	2 (0.24)	0	0	NG_048174
tet(D)	tetracyclines	5 (0.14)	0	0	0	NG_048182.1
tet(G)	tetracyclines	68 (1.95)	55 (6.65)	0	0	NG_051907
tet(M)	tetracyclines	57 (1.63)	17 (2.06)	0	0	NG_048216
dfrA1	trimethoprim	81 (2.32)	17 (2.06)	0	0	AY963803
dfrA12	trimethoprim	84 (2.41)	38 (4.59)	0	2 (1.83)	KU860570
dfrA14	trimethoprim	65 (1.86)	23 (2.78)	0	2 (1.83)	Z50805
dfrA15	trimethoprim	6 (0.17)	0	0	0	Z50805
dfrA16	trimethoprim	9 (0.26)	9 (1.09)	0	0	NG_047705
dfrA17	trimethoprim	5 (0.14)	2 (0.24)	0	0	KX573886
dfrA18	trimethoprim	1 (0.03)	0	0	0	NG_050402
dfrA27	trimethoprim	5 (0.14)	0	1 (0.34)	0	KC540632
dfrA5	trimethoprim	41 (1.17)	14 (1.69)	0	0	JF806498
dfrA7	trimethoprim	3 (0.09)	1 (0.12)	2 (0.68)	0	JF806498
dfrA8	trimethoprim	3 (0.09)	0	0	0	U10186
blaPSE-1/blaCARB-2	β-lactams	75 (2.15)	59 (7.13)	0	0	M69058
blaCMY-2	β-lactams	16 (0.46)	7 (0.85)	0	1 (0.92)	X91840
blaCTX-M-1	β-lactams	3 (0.09)	0	0	0	X92506
blaCTX-M-14	β-lactams	8 (0.23)	2 (0.24)	0	5 (4.59)	AF252622
blaCTX-M-15	β-lactams	4 (0.11)	1 (0.12)	0	0	AY044436
blaCTX-M-3	β-lactams	1 (0.03)	0	0	0	EF437434
blaCTX-M-55	β-lactams	9 (0.26)	7 (0.85)	0	0	DQ885477
blaCTX-M-65	β-lactams	6 (0.17)	0	0	0	EF418608
blaCTX-M-9	β-lactams	10 (0.29)	10 (1.21)	0	0	AF174129
blaHERA-3	β-lactams	1 (0.03)	1 (0.12)	0	0	NG_049159
blaOXA-1	β-lactams	4 (0.11)	3 (0.36)	0	0	J02967
blaOXA-10	β-lactams	1 (0.03)	0	0	1 (0.92)	U37105
blaOXA-114	β-lactams	1 (0.03)	0	0	1 (0.92)	EU188842
blaOXA-134	β-lactams	1 (0.03)	1 (0.12)	0	0	HQ122933
blaSHV-12	β-lactams	4 (0.11)	0	0	0	AJ920369
blaTEM-1	β-lactams	603 (17.27)	392 (47.40)	9 (3.06)	63 (57.80)	AF188200
blaTEM-117	β-lactams	12 (0.34)	1 (0.12)	0	0	AY130282
blaTEM-135	β-lactams	7 (0.20)	0	6 (2.04)	0	AJ634602
blaTEM-159	β-lactams	4 (0.11)	0	0	0	EF136376
blaTEM-176	β-lactams	1 (0.03)	0	0	0	GU550123
blaTEM-191	β-lactams	3 (0.09)	1 (0.12)	0	0	JF949916
blaTEM-215	β-lactams	1 (0.03)	0	0	0	KP050492
blaTEM-217	β-lactams	1 (0.03)	1 (0.12)	0	0	KM114268
blaTEM-33	β-lactams	1 (0.03)	1 (0.12)	0	0	GU371926
blaTEM-57	β-lactams	6 (0.17)	0	4 (1.36)	2 (1.83)	FJ405211
